# Supplementary material for: The Leaf Essential Oil of Myrtus communis subsp. tarentina (L.) Nyman: From Phytochemical Characterization to Cytotoxic and Antimigratory Activity in Human Prostate Cancer Cells
Source: MDPI journal article supplement (doi:10.3390/plants12061293), 2023-03-13

Chromatogram of essential oil obtained from *Myrtus tarentina*

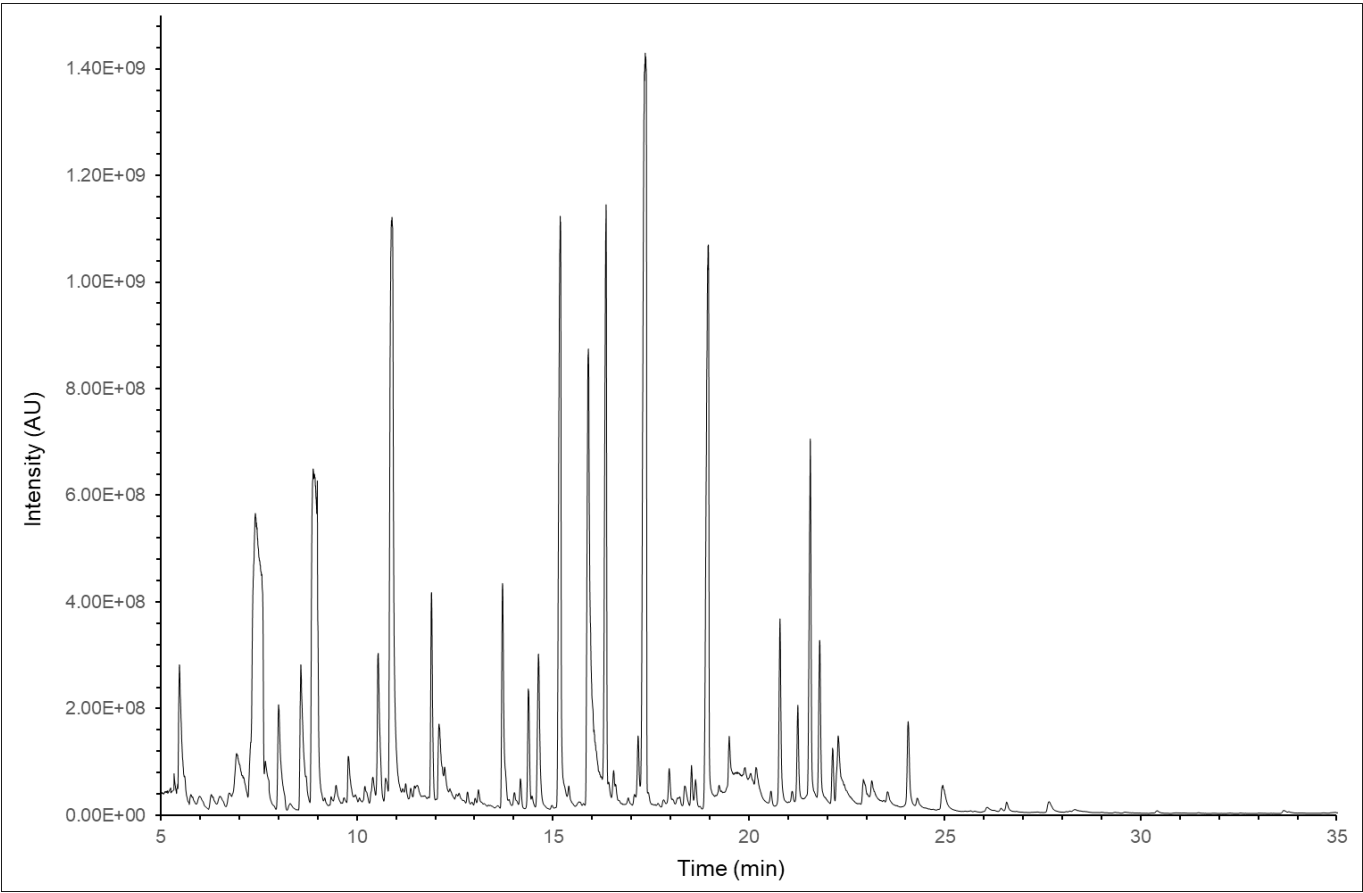

MS spectrum of peak with RT = 7.42 min

MIRTO\_TAREN #711 RT: 7.42 AV: 1 NL: 7.19E7  
T: + c EI Full ms [50.00-1000.00]

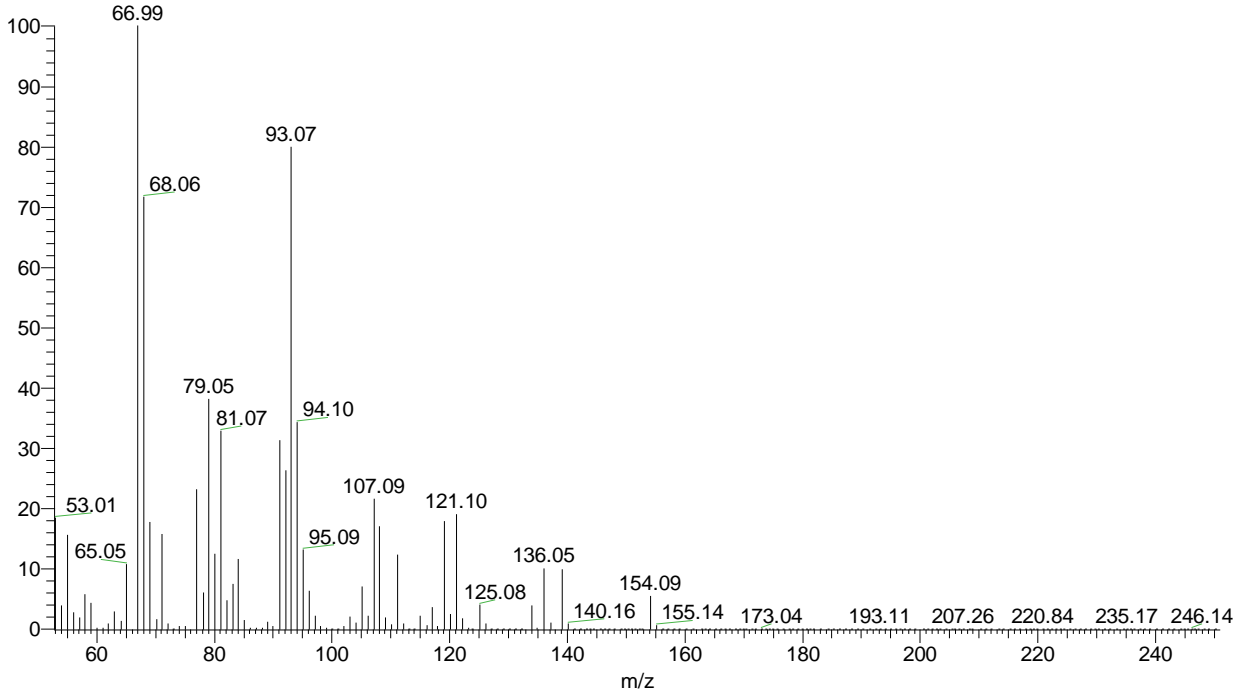

MS Spectrum of peak with RT = 21.24 min

MIRTO\_TAREN #4776 RT: 21.24 AV: 1 NL: 2.47E7  
T: + c EI Full ms [50.00-1000.00]

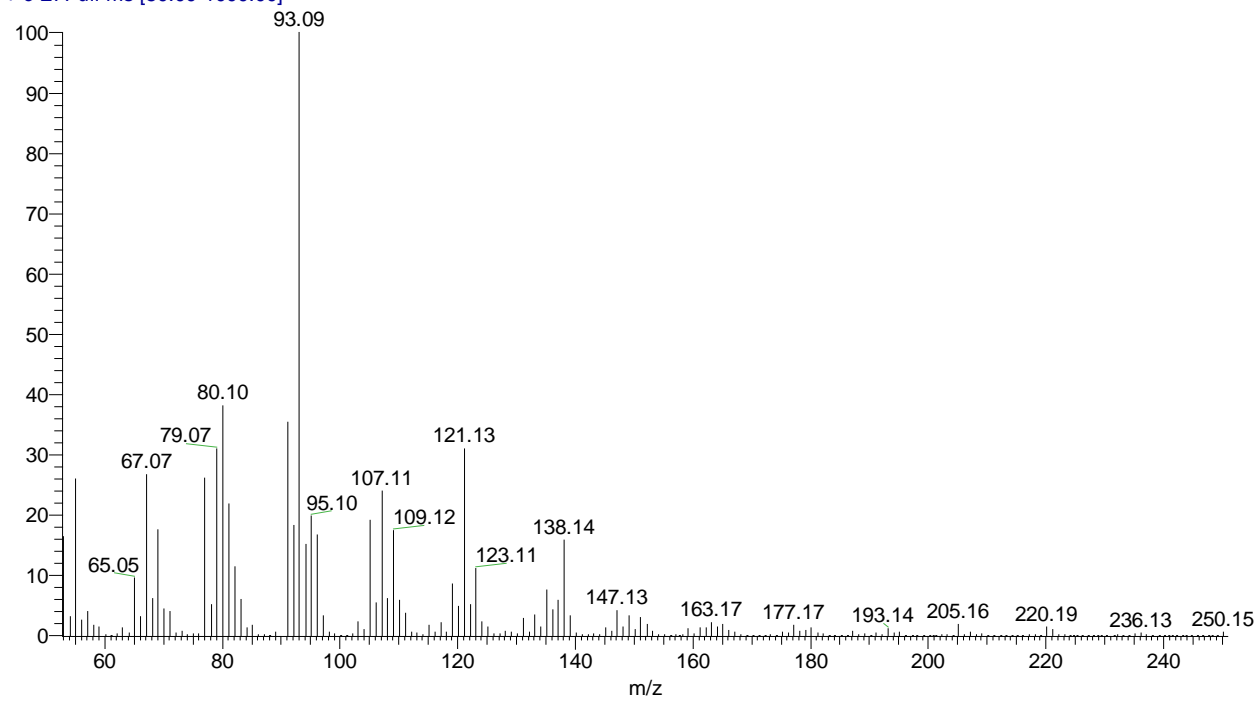

Supplement: s1 [file s1]
